# Supplementary material for: A missense variant in SHARPIN mediates Alzheimer’s disease-specific brain damages
Source: PubMed Central journal article supplement (PMC8595886; doi:10.1038/s41398-021-01680-5), 2021-11-16

**(A) PC1 vs PC2**

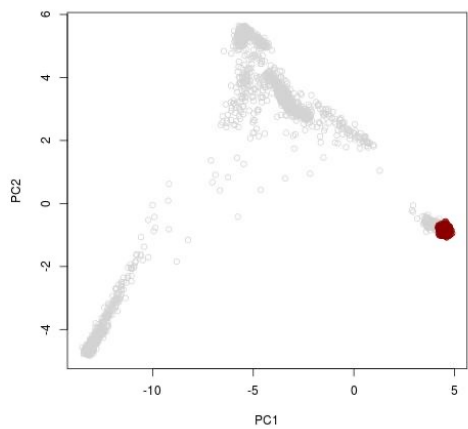

**(B) PC2 vs PC3**

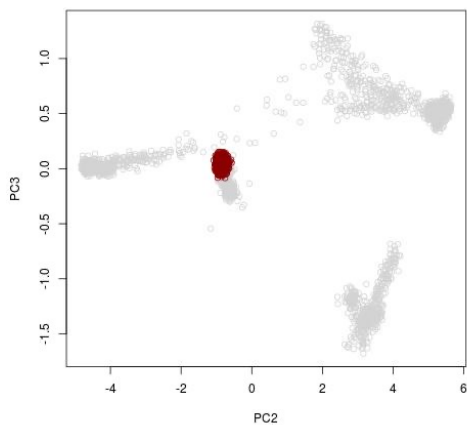

**(B) PC1 vs PC3**

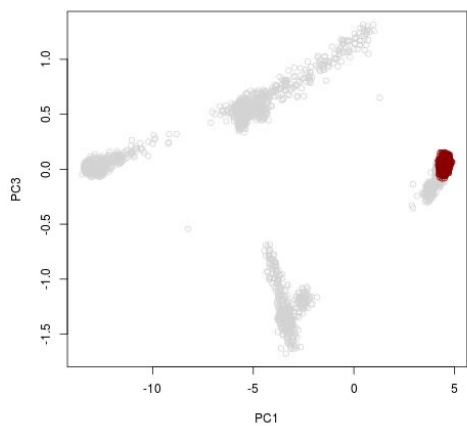

Supplement: 41398_2021_1680_MOESM4_ESM.pdf [file 41398_2021_1680_MOESM4_ESM.pdf]
