# Supplementary material for: A missense variant in SHARPIN mediates Alzheimer’s disease-specific brain damages
Source: PubMed Central journal article supplement (PMC8595886; doi:10.1038/s41398-021-01680-5), 2021-11-16

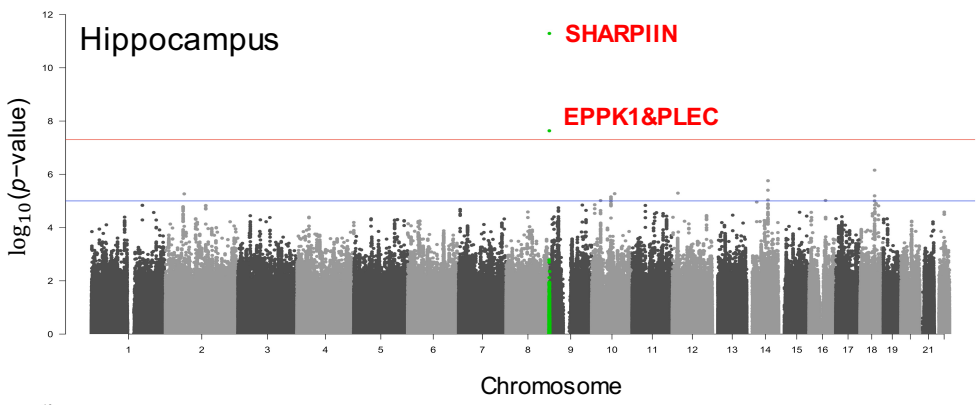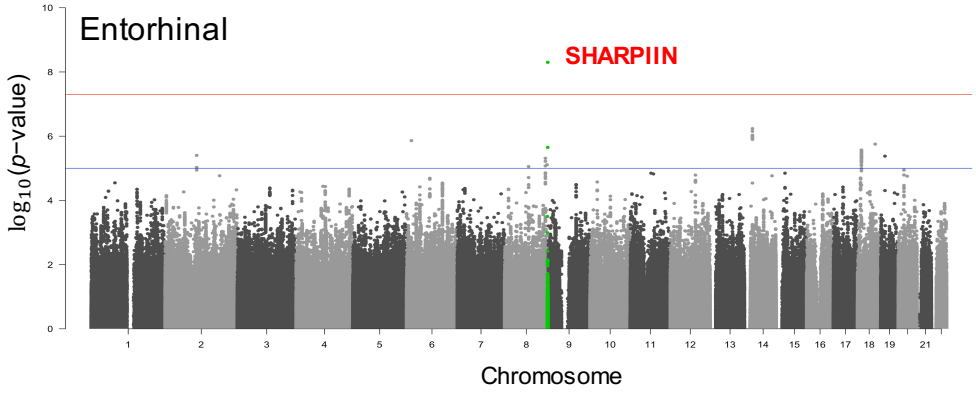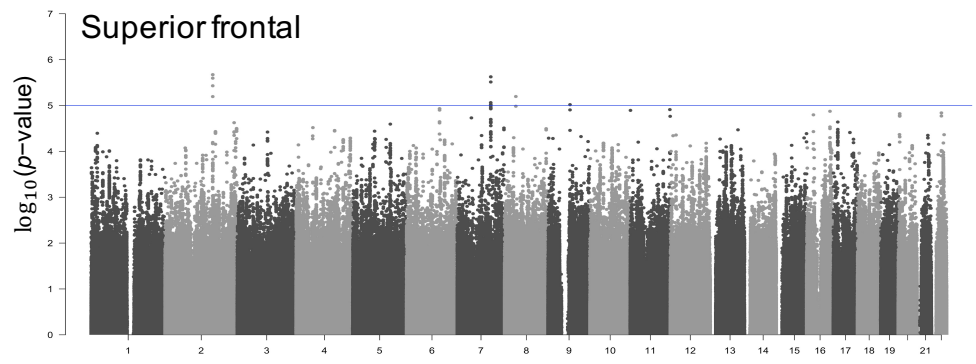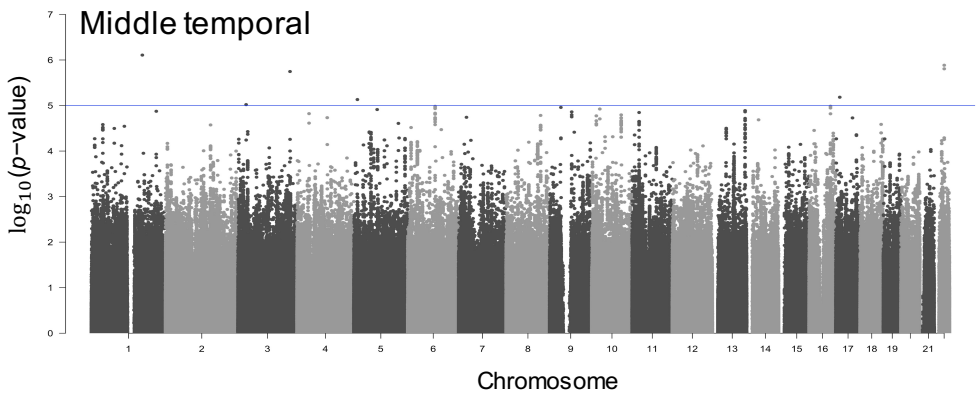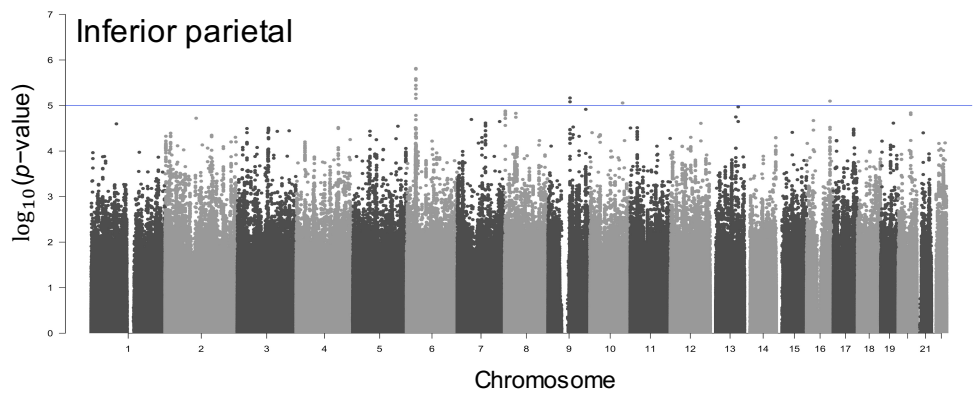

Supplement: 41398_2021_1680_MOESM5_ESM.pdf [file 41398_2021_1680_MOESM5_ESM.pdf]
